# Supplementary material for: Stimulation of ROS Generation by Extract of Warburgia ugandensis Leading to G0/G1 Cell Cycle Arrest and Antiproliferation in A549 Cells
Source: MDPI journal article supplement (doi:10.3390/antiox10101559), 2021-09-30
Supplement: s1 [file s1]

**Table S1 Cytotoxicity of partial plant extracts against NSCLC cell lines**

| Plant                            | Part used    | Extract solvent | Cell  | IC50 (µg/mL) | Incubation time (h) | method | Referenc (PMID) |
|----------------------------------|--------------|-----------------|-------|--------------|---------------------|--------|-----------------|
| <i>Fritillariae cirrhosae</i>    | Bulbs        | aqueous         | A549  | 37.62        | 48                  | CCK8   | 31669666        |
| <i>Elephantopus mollis</i>       | whole plant  | ethyl acetate   | A549  | 18.66 ± 5.11 | 48                  | MTT    | 32763415        |
| <i>Melissa officinalis</i>       | leaves       | ethanolic       | H460  | 100.9 ± 16.2 | 48                  | MTT    | 29790547        |
| <i>Eucalyptus globulus</i>       | aerial parts | aqueous         | H460  | 51.7 ± 2.0   | 48                  | SRB    | 31165800        |
| Green tea                        |              |                 | A549  | 112          | 24                  | MTT    | 19137550        |
| <i>Toona sinensis</i>            | leaves       | aqueous         | H441  | 200          | 48                  | MTT    | 20478545        |
| <i>Toona sinensis</i>            | leaves       | aqueous         | H661  | 120          | 48                  | MTT    | 20478545        |
| <i>Toona sinensis</i>            | leaves       | aqueous         | H520  | 250          | 48                  | MTT    | 20478545        |
| <i>Bupleurum scrozonrifolium</i> | roots        | acetone         | A549  | 60           | 24                  | MTT    | 15863267        |
| <i>Foeniculum vulgare</i>        | seeds        | ethanol         | H661  | 500-1000     | 48                  | MTS    | 33395604        |
| <i>Marsdenia tenacissima</i>     | stem         | petroleum ether | A549  | 560 ± 50     | 24                  | CCK8   | 31926315        |
| <i>Marsdenia tenacissima</i>     | stem         | ethyl acetate   | A549  | 850 ± 40     | 24                  | CCK8   | 31926315        |
| <i>Marsdenia tenacissima</i>     | stem         | n-butanol       | A549  | 560 ± 30     | 24                  | CCK8   | 31926315        |
| <i>Selaginella doederleinii</i>  |              | ethyl acetate   | A549  | 87.17 ± 0.04 | 48                  | MTT    | 27292193        |
| <i>Taxus chinensis</i>           |              | aqueous         | H820  | 100-150      | 48                  | CCK8   | 33740524        |
| <i>Taxus chinensis</i>           |              | aqueous         | A549  | 100-150      | 48                  | CCK8   | 33740524        |
| <i>Scutellaria baicalensis</i>   | roots        | ethanol         | H1299 | 50-100       | 72                  | MTT    | 34068421        |
| <i>Scutellaria baicalensis</i>   | roots        | ethanol         | A549  | 50-100       | 72                  | MTT    | 34068421        |
| <i>Rhus verniciflua</i>          |              | aqueous         | A549  | 500-1000     | 24                  | CCK8   | 27667098        |
| <i>Alnus nitida</i>              | leaves       | methanol        | A549  | 14.91 ± 0.17 | 48                  | MTT    | 30508737        |
| <i>Alnus nitida</i>              | stem         | methanol        | A549  | 22.67 ± 0.17 | 48                  | MTT    | 30508737        |
|                                  | barks        |                 |       |              |                     |        |                 |
| <i>Alnus nitida</i>              | leaves       | methanol        | H460  | 10.67 ± 0.12 | 48                  | MTT    | 30508737        |
| <i>Alnus nitida</i>              | stem         | methanol        | H460  | 25.47 ± 0.13 | 48                  | MTT    | 30508737        |
|                                  | barks        |                 |       |              |                     |        |                 |
| <i>Punica granatum</i>           | leaves       | ethanol         | A549  | 50           | 72                  | MTT    | 27133061        |
| <i>Punica granatum</i>           | leaves       | ethanol         | H1299 | 47           | 72                  | MTT    | 27133061        |
